# Supplementary material
Source: publisher figshare collection journal article supplement (https://gsapubs.figshare.com/ndownloader/files/23294051)
Supplement: Supplementary file 1 [file 23294051]

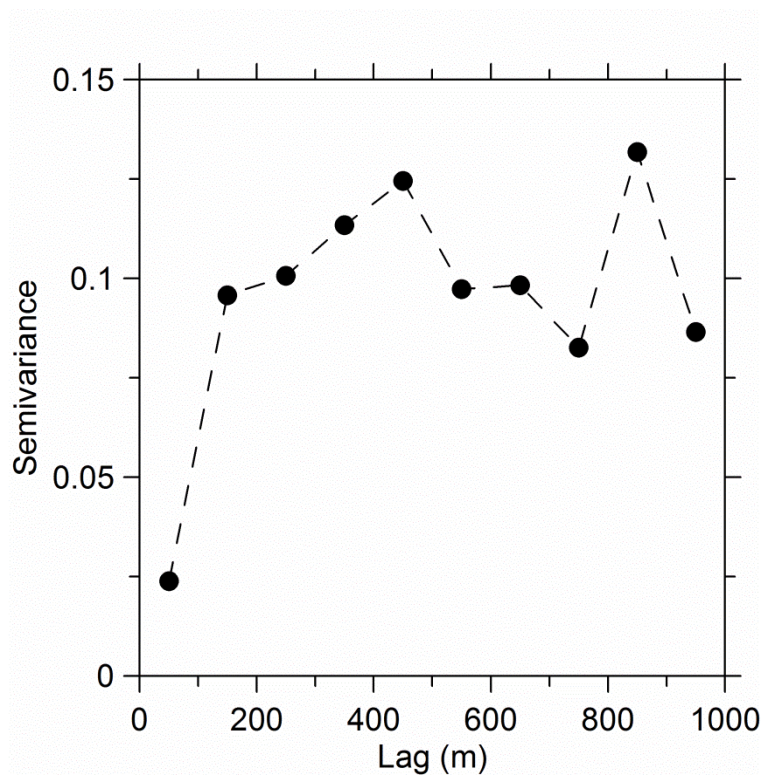

**Supplemental Figure DR1.** Experimental semi-variogram of HC residence time measurements. Data has been log-transformed and normalized to have a mean of 0. Note that at lags > 100 m, value of semivariance fluctuates around a constant value.

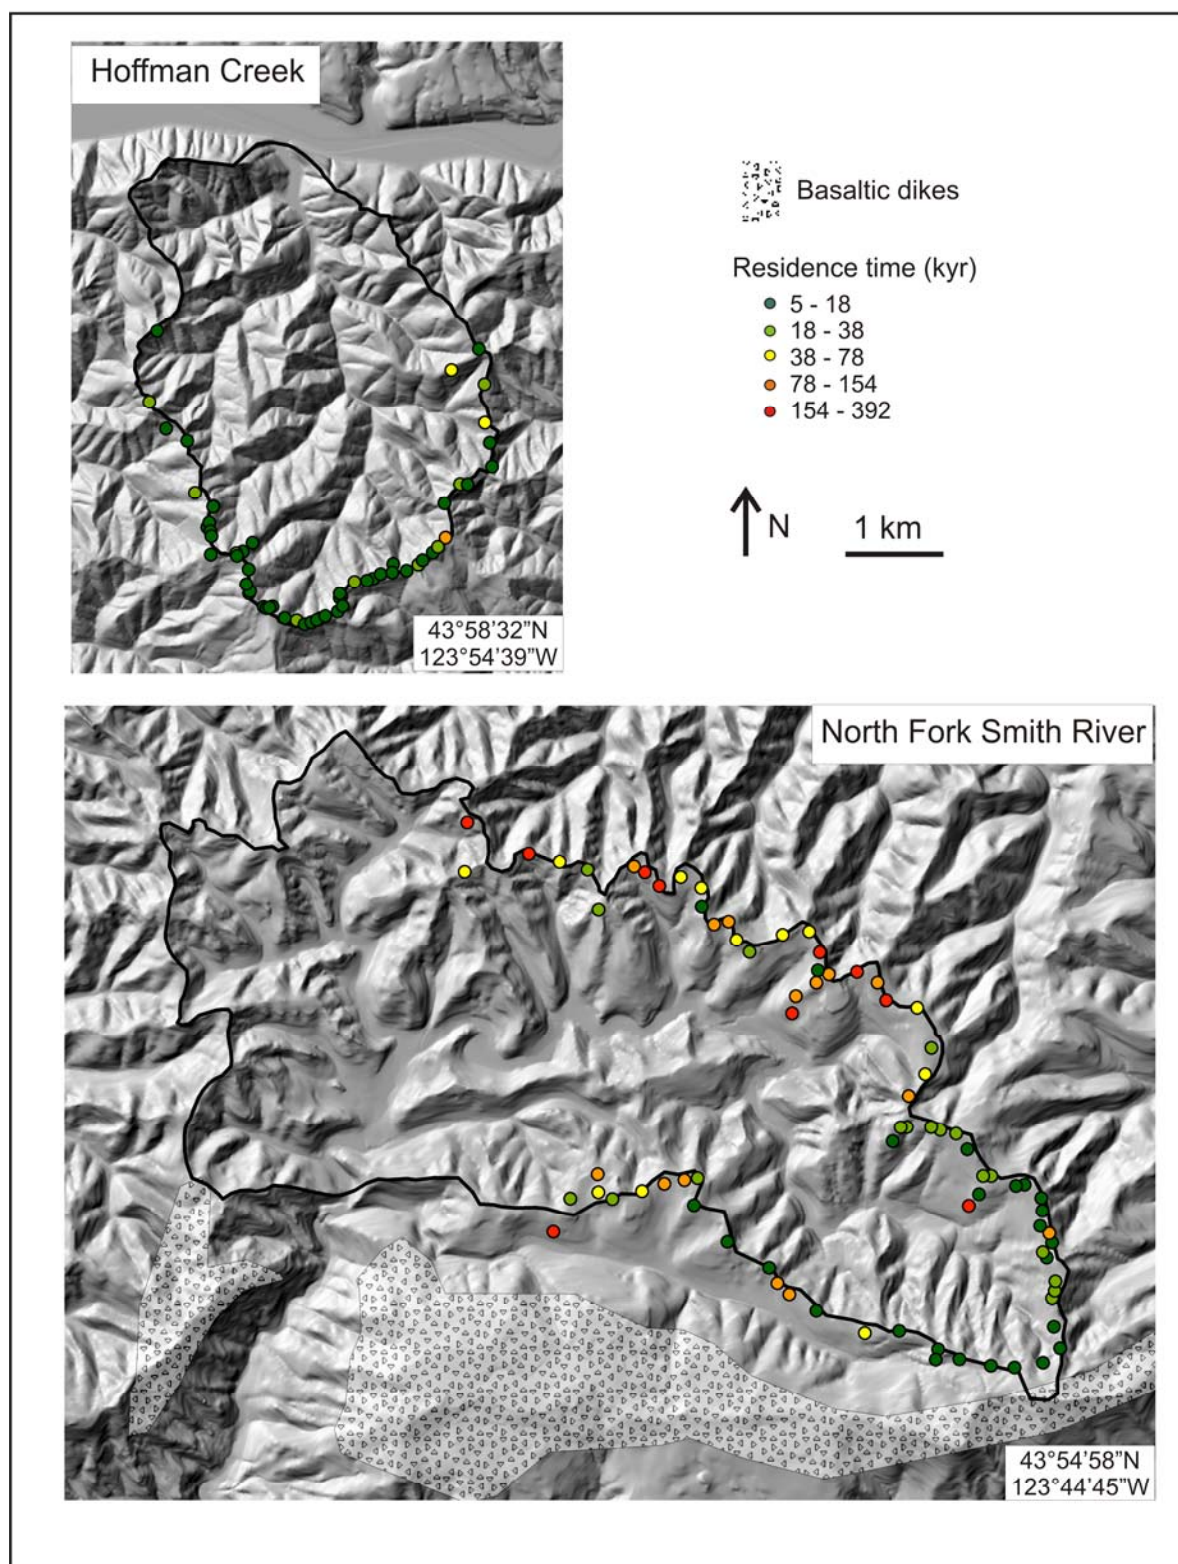

**Supplemental Figure DR2.** Map of HC and NFSR watersheds with sample locations colored by residence time. Latitude/longitude coordinates are for bottom corner of maps.
